# Supplementary material for: Solid-state AIEnh-circularly polarised luminescence of chiral perylene diimide fluorophores
Source: PubMed Central journal article supplement (PMC9059715; doi:10.1039/c8ra09785b), 2019-01-14
Supplement: RA-009-C8RA09785B-s001.pdf [file RA-009-C8RA09785B-s001.pdf]

Electronic Supporting Information for

## Solid-State AIEnh-Circularly Polarised Luminescence of Chiral Perylene Diimide Fluorophores

Ayano Taniguchi,<sup>a</sup> Daiki Kaji,<sup>a</sup> Nobuyuki Hara,<sup>a</sup> Ryosuke Murata,<sup>b</sup> Shogo Akiyama,<sup>a</sup> Takunori Harada,<sup>c</sup> Atsushi Sudo,<sup>a</sup> Hiroyuki Nishikawa,<sup>\*b</sup> and Yoshitane Imai<sup>\*a</sup>

<sup>a</sup> Department of Applied Chemistry, Faculty of Science and Engineering, Kindai University, 3-4-1 Kowakae, Higashi-Osaka, Osaka 577-8502, Japan. E-mail: (Y.I.) y-imai@apch.kindai.ac.jp.

<sup>b</sup> Graduate School of Science and Engineering, Ibaraki University, 2-1-1 Bunkyo, Mito, Ibaraki 310-8512, Japan. E-mail: (H.N.) hiroyuki.nishikawa.sci@vc.ibaraki.ac.jp

<sup>c</sup> Department of Integrated Science and Technology, Faculty of Science and Technology, Oita University, Dannoharu, 700, Oita city 870-1192, Japan

### Table of Contents

|                |                                                                                                |    |
|----------------|------------------------------------------------------------------------------------------------|----|
| <b>Fig. S1</b> | <sup>1</sup> H-NMR spectrum of ( <i>R,R</i> )- <b>BPP</b> in CDCl <sub>3</sub> (500 MHz).....  | S2 |
| <b>Fig. S2</b> | <sup>13</sup> C-NMR spectrum of ( <i>R,R</i> )- <b>BPP</b> in CDCl <sub>3</sub> (125 MHz)..... | S2 |
| <b>Fig. S3</b> | <sup>1</sup> H-NMR spectrum of ( <i>S,S</i> )- <b>BPP</b> in CDCl <sub>3</sub> (500 MHz).....  | S3 |
| <b>Fig. S4</b> | <sup>13</sup> C-NMR spectrum of ( <i>S,S</i> )- <b>BPP</b> in CDCl <sub>3</sub> (125 MHz)..... | S3 |

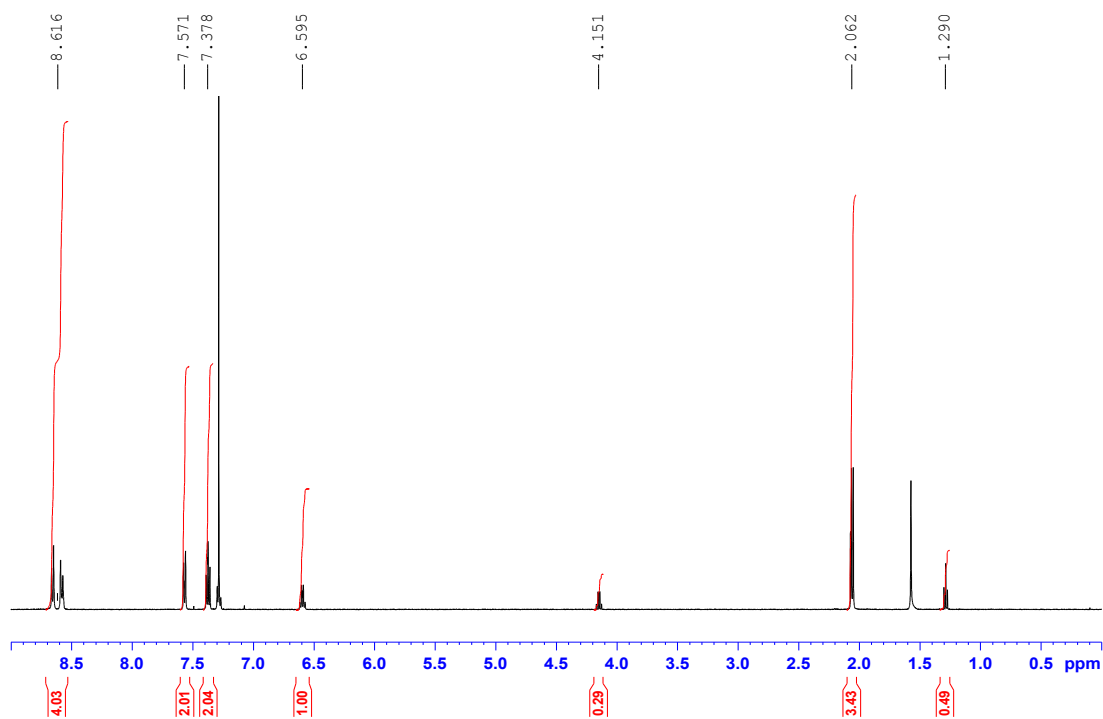

**Fig. S1**  $^1\text{H}$ -NMR spectrum of (*R,R*)-**BPP** in  $\text{CDCl}_3$  (500 MHz).

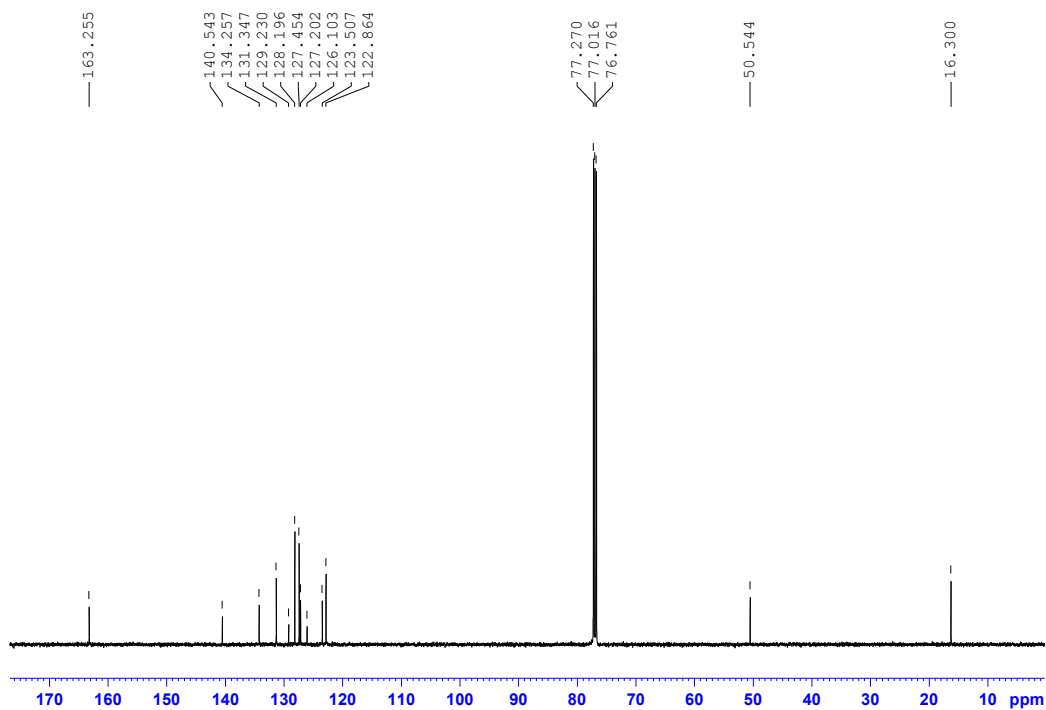

**Fig. S2**  $^{13}\text{C}$ -NMR spectrum of (*R,R*)-**BPP** in  $\text{CDCl}_3$  (125 MHz).

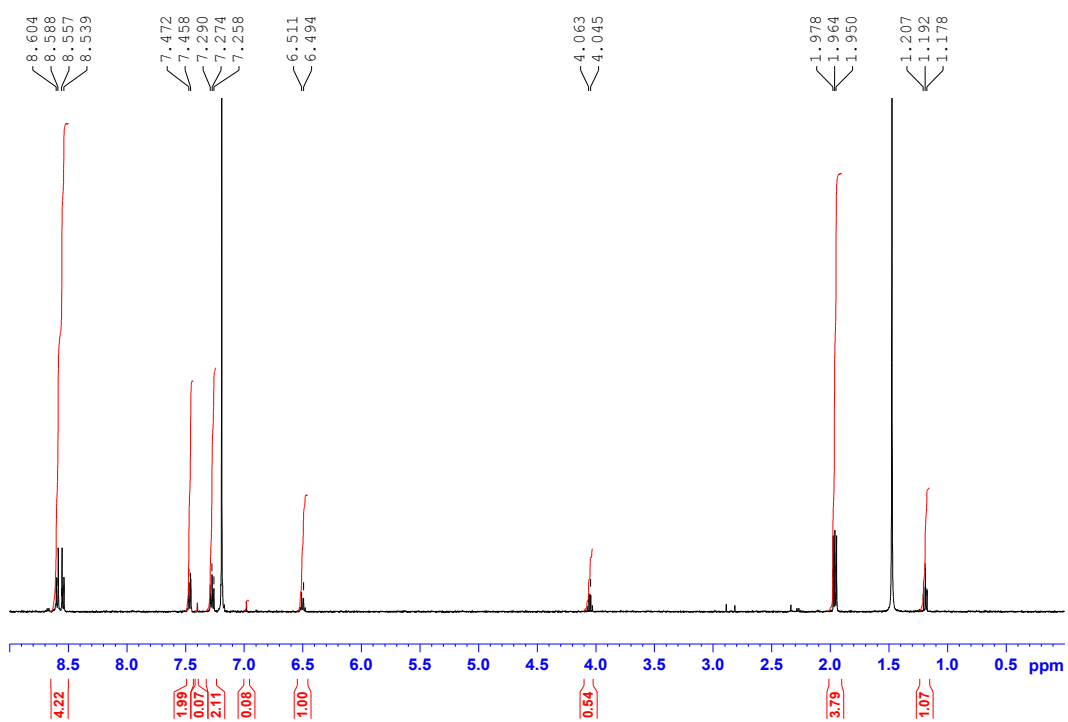

**Fig. S3**  $^1\text{H}$ -NMR spectrum of (*S,S*)-BPP in  $\text{CDCl}_3$  (500 MHz).

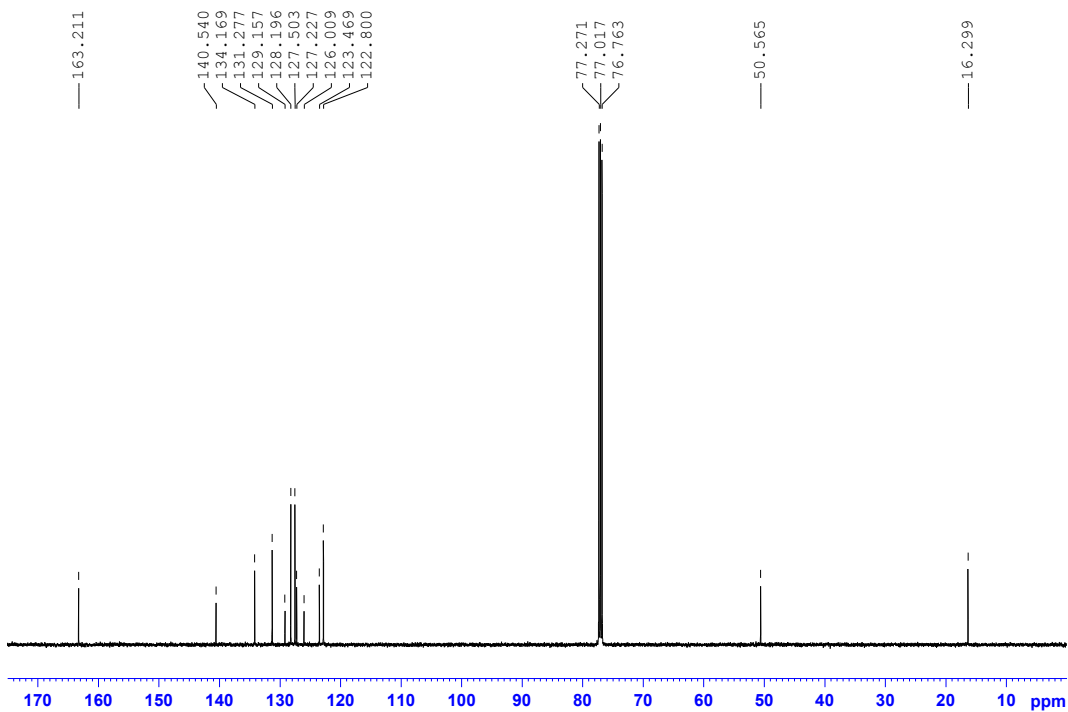

**Fig. S4**  $^{13}\text{C}$ -NMR spectrum of (*S,S*)-BPP in  $\text{CDCl}_3$  (125 MHz).
